# Supplementary material for: Cascade chemistry in azacryptand cages: bridging carbonates and methylcarbonatesElectronic supplementary information (ESI) available: magnetic data. See http://www.rsc.org/suppdata/dt/b1/b110449g/
Source: Royal Society of Chemistry journal article supplement (doi:10.1039/b110449g), 2002-03-20
Supplement: b110449g1.doc [file b110449g1.doc]

**Supplementary Material (ESI) for Dalton Transactions**

**This journal is © The Royal Society of Chemistry 2002**

**Complex 1**

[Cu2(L1)(CO3)](ClO4)2(H2O)2

Data: A1CU05X_B

Model: S1=S2=1/2 +tip

Chi^2 = 6817.18116

g 1.92952 0.03066

J -106.51242 2.6366

TIP 60 0

Paramag imp 0.06935 0.00222

T chi mu

5.2 9013 0.612

6.0 7913 0.617

7.3 6733 0.626

8.6 5782 0.630

9.5 5253 0.631

10.8 4678 0.636

12.8 3955 0.636

14.9 3420 0.638

15.0 3343 0.633

17.2 3002 0.642

19.4 2692 0.646

23.4 2282 0.653

26.0 2047 0.652

30.3 1793 0.659

34.4 1594 0.662

38.4 1461 0.670

42.7 1321 0.672

44.2 1289 0.675

47.8 1225 0.684

52.8 1141 0.694

57.6 1080 0.706

62.5 1047 0.723

67.2 1032 0.745

72.3 1017 0.767

77.1 1008 0.788

81.9 1009 0.813

86.8 1016 0.840

91.6 1034 0.870

96.5 1040 0.896

101.2 1052 0.923

106.0 1070 0.952

110.9 1083 0.980

115.8 1103 1.010

120.6 1118 1.039

125.4 1130 1.065

130.9 1146 1.095

135.9 1156 1.121

140.9 1164 1.145

145.7 1171 1.168

150.6 1178 1.191

155.5 1182 1.212

160.4 1185 1.233

165.3 1191 1.255

170.1 1188 1.271

175.0 1187 1.289

179.9 1180 1.303

184.7 1179 1.320

189.5 1178 1.336

194.4 1172 1.350

199.3 1164 1.362

204.2 1165 1.379

209.1 1159 1.392

213.9 1142 1.398

218.8 1133 1.408

223.7 1128 1.421

228.6 1120 1.431

233.5 1113 1.442

238.3 1097 1.446

243.2 1085 1.453

248.3 1076 1.461

254.0 1065 1.471

259.1 1047 1.471

264.1 1043 1.488

269.0 1032 1.490

274.1 1028 1.501

278.6 1019 1.507
